# Supplementary material for: Deciphering molecular mechanism of silver by integrated omic approaches enables enhancing its antimicrobial efficacy in E. coli
Source: PLoS Biol. 2019 Jun 10;17(6):e3000292. doi: 10.1371/journal.pbio.3000292 (PMC6557469; doi:10.1371/journal.pbio.3000292)
Supplement: S7 Table — AgNO3, silver nitrate. (XLSX) [file pbio.3000292.s024.xlsx]

## Sheet: Sheet1
S7 Table. Significant changes in the levels of intracellular metabolites of E. coli cells upon exposure to AgNO3 at different concentrations.
Metabolites	Correlation coefficients (ra) (treatment vs. the control)
	0.4 μg/ml AgNO3 treated	4 μg/ml AgNO3 treated
	R2X = 0.292	R2X = 0.756
	Q2 = 0.913	Q2 = 0.976
Asp	-0.73	-
His	-0.64	-0.85
Trp	-	-0.86
Phe	-	-0.88
Glc	-	-0.85
Lac	-0.86	-
Succinate	-	0.62
AMP	-	-0.96
Gluconate	-	-0.97
GlcNAc	-0.88	-0.93
UDP GlcA	-	0.62
UDP GlcNAc	-0.64	-
NAD+	-	-0.67
NADP+	-0.78	-0.68
Uracil	-0.64	0.65
Uridine	-0.6	-0.77
IMP	-	-0.93
Guanosine	-0.68	-0.93
Hypoxanthine	-0.61	-
Betaine	-	-0.96
TMA	-0.61	-0.9
GSH	-0.7	-
Gly	-	-0.95
aCorrelation coefficients, positive and negative signs indicate positive and negative correlation in the concentrations respectively. P = 0.05, |r| = 0.602 was used as the cutoff value of correlation coefficient for the statistical significance based on the discrimination significance respectively. “–” means the correlation coefficient |r| is less than the cutoff value.
